# Supplementary material
Source: publisher figshare collection journal article supplement (https://tandf.figshare.com/ndownloader/files/21622587)
Supplement: Supplementary file 1 [file 21622587]

## Sheet: Supplementary Table 1
Supplementary Table 1. List of (potential) BPA substitutes as compiled from publications and inventories from a variety of official bodies and governmental agencies: INERIS, Danish EPA, US EPA, Swedish KEMI, French ANSES, NTP.
		Information from official bodies and governmental agencies		Information from ECHA database				Information from literature search
Name	CASNR	Source	Uses/exposure	Registered/Disseminated dossier available	Tonnage band	Registered uses	number of notifyers	Detection in consumer products/biomonitoring data	References	Prioritization	Remarks
BHT 2,6-di-tert-butyl-p-crésol	128-37-0	ANSES 2013b	Thermal paper	Yes/Yes	10000-100000	agrochemicals, lubricant, solvent use, construction, coatings, paints, thinners, cosmetics, cleaning products (laundry), fertilizers,	4670	Toys	NVWA (2005) Bittner et al. (2014) Bhunia et al., 2013	Include
Benzoic acid	65-85-0	INIRES	Thermal paper	Yes/Yes	100000-1000000	Use as intermediate, Cosmetics, personal care products	2136	Toys	NVWA (2005)	Include
Tefacid Stearic 95 octadecanoic acid	57-11-4	INIRES	Thermal paper	Yes/Yes	10000-100000	Cosmetics, parfumes, fragrances, washing and cleaning products, automotic care products, biocides, coatings, paper products, leather products	1818	Toys	NVWA (2005)	Include
p-tert-butylphenol 4-tert-butylphenol	98-54-4	ANSES 2013b	Thermal paper	Yes/Yes	10000-100000	Production of polymers (large scale), use in water treatment and oilfield sites, coatings, paints, fillers	2441	Toys	NVWA (2005)	Include
Anox® PP18, Irganox 1076 3- (3,5-di-tert-butyl-4-hydroxyphenyl) propiote of octadecyl	2082-79-3	ANSES 2013b	Thermal paper	Yes/Yes	10000+	Adhesives, sealants, lubricants, polymer production, thermoplastic in automotiv, wood plastic composite, paints	1100	Food (packaging)	Onghena et al. (2014)	Include
Bisphenol S (BPS) 4-Hydroxyphenyl sulfone	80-09-1	INERIS, ANSES 2013a, Danish EPA 2014, ANSES 2013b, NTP 2017	thermal paper, infant feeding bottles, childrens table ware, plastic/resins/dental polymers, personal care products Dust	Yes/Yes	10000 - 100000	manufacture thermal paper, production of tanning agents, manufacture of polymers, leather production	319	Urine (children) Urine (pregnant women) Breastmilk Food (fish) Food (packaging) Personal care products House dust	Yao et al. (2018) Chen et al. (2018) Philips et al. (2018) Heffernan et al. (2016) Deceuninck et al. (2015) Wong et al. (2017) Jurek and Leitner (2017) Chen et al. (2017) Pivnenko et al. (2015) Yang et al. (2014) Liao and Kannan (2015, 2013) Cheng et al. (2017) Lu et al. (2018) Liao et al. (2012)	Include
Irganox 1010 tetrakis (3- (3,5-di-tert-butyl-4-hydroxyphenyl) propiote) pentaerythritol	6683-19-8	ANSES 2013b	Thermal paper	Yes/Yes	10000+	adhesives, sealants, lubricants, polymer production, thermoplastic in automotiv, wood plastic composite	1906	Food (packaging) Baby bottles	Dopico-Garcia et al. (2007) Onghena et al. (2014) Onghena et al. (2015)	Include
Bisphenol AF (BPAF) 4,4´-[2,2,2-Trifluoro-1-(trifluoromethyl)ethylidene]diphenol	1478-61-1	Kemi 2017, NTP 2017	plastic/resins/dental polymers, food, dust	Yes/Yes	100-1000	Reactive process regulator in polymer materials	156	Urine (children) Urine (men and women) Food (packaging) Personal care products House dust	Yao et al. (2018) Chen et al. (2018) Rocha et al. (2016) Chen et al. (2017) Yang et al. (2014) Liao and Kannan (2015, 2013) Cheng et al. (2017) Lu et al. (2018) Liao et al. (2012)	Include
BDP/BPA-BDPP Bisphenol-A bis(diphenyl phosphate)	5945-33-5	NTP 2017	Flame retardant	Yes/Yes	100-10000 (multiple dossiers)	Manufacture of plastic modules, flame retardant	569	Dust (flame retardant)	Brandsma et al. (2013)	Include
Bisphenol F (BPF) Bis(4- hydroxyphenyl)methane	620-92-8	INERIS, ANSES 2013a, NTP 2017, Danish EPA 2014, ANSES 2013b, Kemi 2017, NTP 2017	thermal paper, synthesis of polymers, coating of food packaging material, paints and electronics, food packaging, dust	Yes/No			80	Urine (children) Urine (pregnant women) Food (fish) Food (packaging) Personal care products House dust	Yao et al. (2018) Chen et al. (2018) Philips et al. (2018) Heffernan et al. (2016) Wong et al. (2017) Cao et al. (2015) Jurek and Leitner (2017) Chen et al. (2017) Pivnenko et al. (2015) Yang et al. (2014) Liao and Kannan (2015, 2013) Gallart-Ayala et al. (2011) Cheng et al. (2017) Lu et al. (2018) Liao et al. (2012)	Include
Tetra Methyl Bis Phenol F (TMBPF), VALPURE V70 Phenol, 4,4'-methylenebis(2,6-dimethyl)-	5384-21-4	Kemi 2017, INERIS	(food) cans	Yes/Yes	100-1000	Use as intermediate	28	Food (packaging) -> future candidate	Soto et al. (2017)	Include
Ethylparaben Ethyl 4-hydroxybenzoate	120-47-8	ANSES 2013b	Thermal paper	Yes/Yes	100-1000	use in cosmetics or pharmaceuticals	736			Exclude	Parabens are used as preservatives in cosmetics, this use is not a BPA-replacement use.
SANTONOX Phenol, 4,4'-thiobis[2-(1,1-dimethylethyl)-5-methyl-	96-69-5	Kemi 2017		Yes/Yes	1000-10000	PE cables, manufacture of resins, use in adhesives and rubber emulsion, production of impact plastic and thermoplastic articles	649			Exclude
Bisphenol AP (BPAP) 4,4‟-(1- Phenylethylidene) bisphenol	1571-75-1	Danish EPA, ANSES 2013b, Kemi 2017, NTP 2017	thermal paper, food, dust, sediment	Yes/Yes	confidential	Not provided	25	Urine (pregnant women) Urine (children) Food (packaging) Personal care products House dust	Philips et al. (2018) Chen et al. (2018) Liao and Kannan (2013) Cheng et al. (2017) Lu et al. (2018) Liao et al. (2012)	Include
Bisphenol Z BPZ Phenol, 4,4'-cyclohexylidenebis-	843-55-0	Kemi 2017, NTP 2017	plastic/resins/dental polymers, food, dust	Yes/No			25	Urine (pregnant women) Urine (children) Food (packaging) Personal care products House dust	Philips et al. (2018) Chen et al. (2018) Liao and Kannan (2015, 2013) Cheng et al. (2017) Lu et al. (2018) Liao et al. (2012)	Include
BHPF, BPFL Phenol, 4,4'-(9H-fluoren-9-ylidene)bis-	3236-71-3	Kemi 2017		Yes/Yes	confidential	Not provided	26	Food (packaging)	Zhang et al. (2017)	Include
Bisphenol B (BPB) 2,2-Bis(4-hydroxyphenyl)butane	77-40-7	ANSES 2013a, NTP 2017	synthesis of polymers, food, dust, sediment	Yes/No			25	Urine (pregnant women) Food (fish) Food (packaging) Food (infant formula) House dust	Philips et al. (2018) Wong et al. (2017) Liao and Kannan (2015, 2013) Alabi et al. (2014) Andra et al. (2015) (-> cunha 2011) Liao et al. (2012)	Include
Bisphenol E (BPE) 4,4'-Ethylidenebisphenol	2081-08-5	NTP 2017	plastic/resins/dental polymers, Municipal sewage sludge	Yes/No			24	Food (packaging)	Jurek and Leitner (2017)	Include
Bisphenol P (BPP) 4.4,4'-(1,4-Phenylenediisopropylidene)bisphenol	2167-51-3	NTP 2017	Food Dust	Yes/No			24	Urine (pregnant women) Urine (women) Urine (children) Food (packaging) Personal care products House dust	Philips et al. (2018) Owczarek et al. (2018) Chen et al. (2018) Liao and Kannan (2015, 2013) Lu et al. (2018) Liao et al. (2012)	Include
ethanedioic acid	144-62-7	INIRES	Thermal paper	Yes/Yes	10000-100000	Washing and cleaning products, polishes and wax blends, coatings, paints, thinners	893			Exclude
Allyl bisphenol A Phenol, 4,4'-(1-methylethylidene)bis[2-(2-propen-1-yl)-	1745-89-7	Kemi 2017		Yes/Yes	1000-10000	Use of reactive process regulators in polymerisation processes, industrical transformation in another substance, polymer preparation	100			Exclude
Benzenepropanoic acid, 3-(1,1-dimethylethyl)-.beta.-[3-(1,1-dimethylethyl)-4-hydroxyphenyl]-4-hydroxy-.beta.-methyl-, 1,1'-(1,2-ethanediyl) ester	32509-66-3	Kemi 2017		Yes/Yes	100-1000	Application of plastics, coatings and inkts	52			Exclude
Phenolphthalein 1(3H)-Isobenzofuranone, 3,3-bis(4-hydroxyphenyl)-	77-09-8	Kemi 2017		Yes/Yes	10-100	Monomer in imported polymers	781			Exclude
3,3′,5,5′-Tetrabromobisphenol A (TBBPA) Phenol, 4,4'-(1-methylethylidene)bis[2,6-dibromo-	79-94-7	Kemi 2017	Flame retardant	Yes/Yes	1000-10000	manufacture of polymer resins, manufacture of plymer resins containing flame retardant	531	Breastmilk	Cariou et al. (2008)	Include
TBMD Phenol, 4,4'-methylenebis[2,6-bis(1,1-dimethylethyl)-	118-82-1	Kemi 2017		Yes/Yes	100-1000	lubricants, washing and cleaning products, plant protection products, coatings and inkts	548			Exclude
Phenol, 4,4'-butylidenebis[2-(1,1-dimethylethyl)-5-methyl-	85-60-9	Kemi 2017, ANSES 2013b		Yes/Yes	100-1000	Automotive, construction, adhesive, sealants	256			Exclude
Phenol, 4,4',4''-(1-methyl-1-propanyl-3-ylidene)tris[2-(1,1-dimethylethyl)-5-methyl-	1843-03-4	Kemi 2017, ANSES 2013b		Yes/Yes	100-1000	thermoplastics used in construction, wire for electric appliances, rafia film and fibers, adhesives and sealants	135			Exclude
p-phenylphenol 1.4-Phenylphenol	92-69-3	ANSES 2013b	Thermal paper	Yes/Yes	0-10 (and three with intermediate usee only)	Formulation of resin	97			Exclude
Phenol, 4,4',4''-ethylidynetris-	27955-94-8	Kemi 2017		Yes/Yes	Du pont: 1+ Sabic and other dossiers: confidential	Sabic: manufacture of chemicals and chemical products Du pont: not provided	584			Exclude
3,5-Heptanedione, 1,7-bis(4-hydroxy-3-methoxyphenyl)-	36062-04-1	Kemi 2017		Yes/Yes	0-10	consumer uses: cosmetics, personal care products	1			Exclude
Bisphenol C (BPC) 2,2‟-Bis(4-hydroxy-3- methylphenyl)propane	79-97-0	U.S. EPA 2014, Danish EPA, ANSES 2013b, NTP 2017	thermal paper, plastic/resins/dental polymers	Yes/Yes	0-10	manufacture thermal paper, coating materials, epoxy resins, polymers, articles of polycarbonate	33	Urine (women)	Owczarek et al. (2018)	Include
PHBB Benzyl 4-hydroxybenzoate	94-18-8	Danish EPA, ANSES 2013b	thermal paper	Yes/Yes	0-10	Industrial use of coatings	194			Exclude
2,4-BPS 2,4‟- Bis(hydroxyphenyl) sulfone	5397-34-2	Danish EPA, ANSES 2013b, NTP 2017	thermal paper	Yes/No			98			Exclude
BPS-MAE Phenol,4-[[4-(2-propen-1- yloxy)phenyl]sulfonyl]-	97042-18-7	Danish EPA, NTP 2017	thermal paper	Yes/Yes	100+	manufacture thermal paper	1			Exclude
Pergafast 201 N-(p-Toluenesulfonyl)-N'- (3-p-toluenesulfonyloxyphenyl)urea	232938-43-1	Danish EPA, ANSES 2013b, NTP 2017	thermal paper	Yes/Yes	confidential	Thermal paper (consumer use of thermal paper included as well)	67			Exclude
HBP (ketone) Methanone, bis(4-hydroxyphenyl)-	611-99-4	Kemi 2017		Yes/Yes	10-100	Monomer for the production of polymers	35			Exclude
Phenol red Phenol, 4,4'-(1,1-dioxido-3H-2,1-benzoxathiol-3-ylidene)bis-	143-74-8	Kemi 2017		Yes/No			122			Exclude
Bisphenol M, BPM Phenol, 4,4'-[1,3-phenylenebis(1-methylethylidene)]bis-	13595-25-0	Kemi 2017, ANSES 2013a	synthesis of polymers	Yes/Yes	0-10 (other dossier confidential)	Polymerisation	25	Urine (women)	Owczarek et al. (2018)	Include
Methanone, bis(2,4-dihydroxyphenyl)-	131-55-5	Kemi 2017		Yes/No			247			Exclude
4,4'-cyclohexylidenedi-o-cresol Phenol, 4,4'-cyclohexylidenebis[2-methyl-	2362-14-3	Kemi 2017		Yes/Yes	100-1000	Not provided	2			Exclude
Methanone, (4-hydroxyphenyl)(2,3,4-trihydroxyphenyl)-	31127-54-5	Kemi 2017		Yes/No			48			Exclude
1-Propanone, 3-(4-hydroxyphenyl)-1-(2,4,6-trihydroxyphenyl)-	60-82-2	Kemi 2017		Yes/No			118			Exclude
1,2-Benzenediol, 4,4'-(2,3-dimethyl-1,4-butanediyl)bis-	500-38-9	Kemi 2017		Yes/No			129			Exclude
2'-(ß-D-glucopyranosyloxy)-4',6'-dihydroxy-3-(4-hydroxyphenyl)propiophenone	60-81-1	Kemi 2017		Yes/Yes	0-10	Use as intermediate	51			Exclude
Phenol Red sodium salt Phenol, 4,4'-(1,1-dioxido-3H-2,1-benzoxathiol-3-ylidene)bis-, sodium salt (1:1)	34487-61-1	Kemi 2017		Yes/No			43			Exclude
Phenol, 4,4'-(1,1-dioxido-3H-2,1-benzoxathiol-3-ylidene)bis[2-bromo-6-methyl-	115-40-2	Kemi 2017		Yes/No			44			Exclude
Tetrabromophenol blue Phenol, 4,4'-(1,1-dioxido-3H-2,1-benzoxathiol-3-ylidene)bis[2,6-dibromo-	115-39-9	Kemi 2017		Yes/No			45			Exclude
Tetra Methyl Bis Phenol A (TMBPA) 4,4’-isopropylidenedi-2,6-xylenol	5613-46-7	NTP 2017	plastic/resins/dental polymers	Yes/Yes	10-100	Polymerisation	26			Exclude
1,2-diphenoxyethane	104-66-5	ANSES 2013b	Thermal paper	Yes/Yes	100-1000	Thermal paper	9			Exclude
boric acid	11113-50-1	INIRES	Thermal paper	Yes/Yes	Intermediate only	Used in synthesis	157			Exclude
benzoic acid, 3,4,5-trihydroxy-	149-91-7	INIRES	Thermal paper	Yes/Yes	0-10 and intermediate use	Paper articles	241			Exclude
MBHA Methyl bis(4- hydroxyphenyl)acetate	5129-00-0	U.S. EPA 2014, Danish EPA, ANSES 2013b, NTP 2017	thermal paper	Yes/No						Exclude
BisOPP-A, Bisphenol PH 4,4‟-Isopropyllidenebis(2- phenylpheno)	24038-68-4	U.S. EPA 2014, NTP, Danish EPA, ANSES 2013b, NTP 2017	thermal paper	Yes/No			25			Exclude
TGSA bis-(3-allyl-4- hydroxyphenyl) sulfone	41481-66-7	Danish EPA	thermal paper	Yes/Yes	confidential	Not provided	8			Exclude
BPS-MPE 4-Hydroxy-4‟- benzyloxydiphenylsulfone	63134-33-8	Danish EPA, ANSES 2013b, NTP 2017	thermal paper	Yes/No			1			Exclude
D-8 4-hydroxyphenyl 4- isoprooxyphenylsulfone	95235-30-6	Danish EPA, NTP 2017	thermal paper	Yes/Yes	confidential	Not provided	16			Exclude
D-90 4-[4'-[(1'-methylethyloxy) phenyl]sulfonyl]phenol	191680-83-8	NTP, Danish EPA, ANSES 2013b, NTP 2017	thermal paper	No						Exclude
DD-70 1,7-bis(4- Hydroxyphenylthio)-3,5- dioxaheptane	93589-69-6	U.S. EPA 2014, NTP, Danish EPA, ANSES 2013b, NTP 2017	thermal paper	Yes/Yes	confidential	Not provided				Exclude
BTUM 4,4'-bis(N-carbamoyl-4- methylbenzenesulfomide) diphenylmethane	151882-81-4	NTP, Danish EPA, ANSES 2013b, NTP 2017	thermal paper	Yes/Yes	confidential	Not provided				Exclude
UU Urea Urethane Compound	321860-75-7	Danish EPA, ANSES 2013b, NTP 2017	thermal paper	No						Exclude
Phenol, 4,4'-[1-[4-[1-(4-hydroxyphenyl)-1-methylethyl]phenyl]ethylidene]bis-	110726-28-8	Kemi 2017		Yes/Yes	confidential	Not provided	9			Exclude
Tetrachlorobisphenol A, TCBPA Phenol, 4,4'-(1-methylethylidene)bis[2,6-dichloro-	79-95-8	Kemi 2017	Flame retardant	Yes/No			25	Breastmilk	Cariot et al. (2012)	Exclude	TCBPA was detected in breastmilk due to chlorination of BPA in drinking water
Benzenebutanoic acid, 4-hydroxy-.gamma.-(4-hydroxyphenyl)-.gamma.-methyl-	126-00-1	Kemi 2017		Yes/No			26			Exclude
Phenol, 2,6-dibromo-4-[1-(3-bromo-4-hydroxyphenyl)-1-methylethyl]-	6386-73-8	Kemi 2017		Yes/No			11			Exclude
Phenol, 4,4'-(1,3-dimethylbutylidene)bis-	6807-17-6	Kemi 2017		Yes/Yes	confidential	Not provided	24			Exclude
Phenol, 4,4'-(1-methylethylidene)bis[2-(1,1-dimethylethyl)-	79-96-9	Kemi 2017		Yes/No						Exclude
1,3-Benzenediol, 4,4'-thiobis-	97-29-0	Kemi 2017		Yes/No						Exclude
Methanone, (3,4-dihydroxyphenyl)(2,4,6-trihydroxyphenyl)-	519-34-6	Kemi 2017		Yes/No			23			Exclude
Cyclofenil diphenol Phenol, 4-[cyclohexylidene(4-hydroxyphenyl)methyl]-	5189-40-2	Kemi 2017		Yes/No			1			Exclude
Phenol, 4,4'-sulfonylbis[2-(2-propen-1-yl)-	41481-66-7	Kemi 2017, NTP 2017	thermal paper	Yes/Yes	confidential	Not provided	8			Exclude
Phenol, 4,4'-(1,1-dioxido-3H-2,1-benzoxathiol-3-ylidene)bis[3-methyl-	2303-01-7	Kemi 2017		Yes/No			2			Exclude
Phenol, 4,4'-(1-methylethylidene)bis[2,6-bis(1,1-dimethylethyl)-	13676-82-9	Kemi 2017		Yes/No						Exclude
Phenol, 4,4'-methylenebis[2-(1,1-dimethylethyl)-6-methyl-	96-65-1	Kemi 2017		Yes/No			15			Exclude
Phenol, 4,4'-(2-pyridinylmethylene)bis-	603-41-8	Kemi 2017		Yes/Yes	Intermediate only	Use as intermediate	7			Exclude
Phenol, 4,4'-(2-ethylhexylidene)bis-	74462-02-5	Kemi 2017		Yes/Yes	0-10	Formulation of inkt	3			Exclude
Phenol, 4,4'-sulfonylbis-, sodium salt (1:2)	3594-55-6	Kemi 2017		Yes/No			30			Exclude
Carbonic acid, polymer with 4,4'-(1-methylethylidene)bis[phenol]	25037-45-0	Kemi 2017		Yes/No			1			Exclude
2H-Indol-2-one, 1,3-dihydro-3,3-bis(4-hydroxy-3-methylphenyl)-	47465-97-4	Kemi 2017		Yes/No						Exclude
Phenol, 4,4'-thiobis[2-(1,1-dimethylethyl)-6-methyl-	96-66-2	Kemi 2017		Yes/No			24			Exclude
1(3H)-Isobenzofuranone, 3,3-bis[4-hydroxy-2-methyl-5-(1-methylethyl)phenyl]-	125-20-2	Kemi 2017		Yes/No			28			Exclude
Cresol red Phenol, 4,4'-(1,1-dioxido-3H-2,1-benzoxathiol-3-ylidene)bis[2-methyl-	1733-12-6	Kemi 2017		Yes/No			29			Exclude
1(3H)-Isobenzofuranone, 3,3-bis(4-hydroxy-3-methylphenyl)-	596-27-0	Kemi 2017		Yes/No			16			Exclude
Glycine, N,N'-[(3-oxo-1(3H)-isobenzofuranylidene)bis[(6-hydroxy-5-methyl-3,1-phenylene)methylene]]bis[N-(carboxymethyl)-	2411-89-4	Kemi 2017		Yes/No			4			Exclude
Phenol, thiobis[tetrapropylene-	68815-67-8	Kemi 2017		Yes/No						Exclude
Ethanone, 1,1'-[methylenebis(4,5,6-trihydroxy-3,1-phenylene)]bis-	168766-34-5	Kemi 2017		Yes/No						Exclude
Phenolphthalein Disodium Salt 1(3H)-Isobenzofuranone, 3,3-bis(4-hydroxyphenyl)-, sodium salt (1:2)	518-51-4	Kemi 2017		Yes/No						Exclude
Phenol, 4,4'-[oxybis(2,1-ethanediylthio)]bis-	90884-29-0	Kemi 2017		Yes/Yes	confidential	Not provided				Exclude
Bromocresol green Phenol, 4,4'-(1,1-dioxido-3H-2,1-benzoxathiol-3-ylidene)bis[2,6-dibromo-3-methyl-	76-60-8	Kemi 2017		Yes/No			16			Exclude
Bromothymol blue Phenol, 4,4'-(1,1-dioxido-3H-2,1-benzoxathiol-3-ylidene)bis[2-bromo-3-methyl-6-(1-methylethyl)-	76-59-5	Kemi 2017		Yes/No			8			Exclude
Phenol, 4,4'-(4,5,6,7-tetrabromo-1,1-dioxido-3H-2,1-benzoxathiol-3-ylidene)bis[2,6-dibromo-	4430-25-5	Kemi 2017		Yes/No			31			Exclude
4,4-thiobisphenol Bis(4-hydroxyphenyl) sulfide	2664-63-3	ANSES 2013b	Thermal paper	Yes/No			36			Exclude
Dimethyl 4-ydroxyphthalate (DMP-OH) 4-Hydroxyphthalic acid dimethyl ester	22479-95-4	ANSES 2013b	Thermal paper	Yes/No						Exclude
Acide 3,5-bis-tertbutylsalicyclique	19715-19-6	ANSES 2013b	Thermal paper	Yes/No			25			Exclude
3,5-Bis(α-methylbenzyl)salicylic acid	53721-15-6	ANSES 2013b	Thermal paper	No						Exclude
Epoxy resins produced from tetramethyl cyclobutane diol (CBDO)	NA	INIRES	application of epoxy resins, not for food tins							Exclude
N-(aminocarbonyl)-4-methylbenzenesulphomide	1694-06-0	INIRES	Thermal paper	Yes/Yes	Intermediate only	Use as intermediate	6			Exclude
p-octadecylphosphonic acid	4724-47-4	INIRES	Thermal paper	Yes/No			22			Exclude
POLYPHLOX 3710	NA	INIRES	Flame retardant							Exclude
PLimC	NA	INIRES	construction equipment, food containers, automotic industry, adhesive							Exclude
